# Supplementary material
Source: ML conference proceedings conference paper supplement (https://proceedings.mlr.press/v97/gamrian19a.html)
Supplement: Supplementary file 1 [file gamrian19a-supp.pdf]

# Supplementary Material

## A. Experimental Setup

### A.1. A3C

For our Breakout experiments we use the standard high-performance architecture implemented in (Kostrikov, 2018a).

Table 3. A3C hyperparameters

| Hyperparameter                | Value                   |
|-------------------------------|-------------------------|
| architecture                  | LSTM-A3C                |
| state size                    | $1 \times 80 \times 80$ |
| # actor learners              | 32                      |
| discount rate                 | 0.99                    |
| Adam learning rate            | 0.0001                  |
| step-returns                  | 20                      |
| entropy regularization weight | 0.01                    |

### A.2. A2C

We use the implementation in (Kostrikov, 2018b) for comparison and as a skeleton for our method implementation.

Table 4. A2C hyperparameters

| Hyperparameter                | Value                   |
|-------------------------------|-------------------------|
| architecture                  | FF-A2C                  |
| state size                    | $4 \times 84 \times 84$ |
| # actor learners              | 84                      |
| discount rate                 | 0.99                    |
| RMSprop learning rate         | 0.0007                  |
| step-returns                  | 20                      |
| entropy regularization weight | 0.01                    |

### A.3. A2C with Imitation Learning

Table 5. A2C with Imitation Learning algorithm hyperparameters

| Hyperparameter               | Value  |
|------------------------------|--------|
| <i>trajectories</i>          | 5      |
| $\beta_1$                    | 0.75   |
| $\beta_2$                    | 0.6    |
| <i>Supervised Iterations</i> | 500    |
| SGD learning rate            | 0.0007 |
| SGD momentum                 | 0.9    |
| <i>b</i>                     | 4      |
| <i>op_interval</i>           | 100    |

## B. Fine-tuning Settings

We consider the following settings for our Fine-tuning experiments on Breakout:

- From-Scratch: The game is being trained from scratch on the target game.
- Full-FT: All of the layers are initialized with the weights of the source task and are fine-tuned on the target task.
- Random-Output: The convolutional layers and the LSTM layer are initialized with the weights of the source task and are fine-tuned on the target task. The output layers are initialized randomly.
- Partial-FT: All of the layers are initialized with the weights of the source task. The three first convolutional layers are kept frozen, and the rest are fine-tuned on the target task.
- Partial-Random-FT: The three first convolutional layers are initialized with the weights of the source task and are kept frozen, and the rest are initialized randomly.

## C. GAN Comparison Evaluation

Table 6. The scores accumulated by an Actor-Critic RL agent using UNIT and Cycle-GAN. We examine both methods by running the RL agent with each every 1000 GAN training iterations and considering the maximum score after  $500k$  iterations.

| Method                 | UNIT   |       | CycleGAN |       |
|------------------------|--------|-------|----------|-------|
|                        | Frames | Score | Frames   | Score |
| A Constant Rectangle   | 333K   | 399   | 358K     | 26    |
| A Moving Square        | 384K   | 300   | 338K     | 360   |
| Green Lines            | 378K   | 314   | 172K     | 273   |
| Diagonals              | 380K   | 338   | 239K     | 253   |
| Road Fighter - Level 2 | 274K   | 5750  | 51K      | 6000  |
| Road Fighter - Level 3 | 450K   | 5350  | 20K      | 3200  |
| Road Fighter - Level 4 | 176K   | 2300  | 102K     | 2700  |
